# Supplementary material
Source: PubMed Central journal article supplement (PMC7860064)
Supplement: ao0c05081_si_001.pdf [file ao0c05081_si_001.pdf]

**Improvement of laccase activity via covalent immobilization over mesoporous silica coated magnetic multi-walled carbon nanotubes for discoloration of synthetic dyes**

Pascal Habimana<sup>1</sup>, Jing Gao<sup>1</sup>, Jean Pierre Mwizerwa<sup>2</sup>, Jean Bernard Ndayambaje<sup>3</sup>, Hengrao Liu<sup>1</sup>, Pengqian Luan<sup>1</sup>, Li Ma<sup>1\*</sup>, Yanjun Jiang<sup>1\*</sup>

<sup>1</sup>School of Chemical Engineering and Technology, Hebei University of Technology, 8 Guangrong Road, Hongqiao District, Tianjin 300130, China.

<sup>2</sup>College of Mechatronics and Control Engineering, Shenzhen University, Houhai Ave, Nanshan District, Guangdong Province, 518060, China

<sup>3</sup>University of Rwanda, College of Science and Technology, 3900 Kigali-Rwanda

\* Corresponding Author: E-mail address: [yanjunjiang@hebut.edu.cn](mailto:yanjunjiang@hebut.edu.cn) (Yanjun Jiang),

[mali0502@hebut.edu.cn](mailto:mali0502@hebut.edu.cn) (Li Ma)



## EXPERIMENTAL SECTION

### Materials

Tetraethylorthosilicate (TEOS), Ferric chloride anhydrous ( $\text{FeCl}_3 \cdot 6\text{H}_2\text{O}$ ), ethylene glycol, sodium acetate, and ethanol of analytical grade were purchased from Tianjin Chemical Corporation. Cetyltrimethyl ammonium bromide (CTAB) was purchased from Sigma-Aldrich, Ammonium nitrate ( $\text{NH}_4\text{NO}_3$ ) and glutaraldehyde (GA, 50%) were purchased from Tianjin Bodi Chemical Co., Ltd. (China). Laccase enzyme (120U/g) was purchased from Shanghai Yuanye Bio-Technology Co., Ltd (China), 2,2'-azino-bis (3-ethylbenzothiazoline-6-sulphonic acid) (ABTS) and multiwalled carbon nanotubes (MWCNTs) with a mean diameter 5-50 nm were purchased from Aladdin Biochemical Technology Co., Ltd (Shanghai, China), Eriochrome black T (EBT), Reactive Black 5 (RB5) and Acid Red 88 (AR88) were purchased from Hubei Jusheng Technology Co., Ltd (China). All reagents were used as received without further purification.

Scanning electron microscopy (SEM) images and the photograph of magnetic separation of  $\text{Fe}_3\text{O}_4\text{-MWCNTs@SiO}_2$  in water.

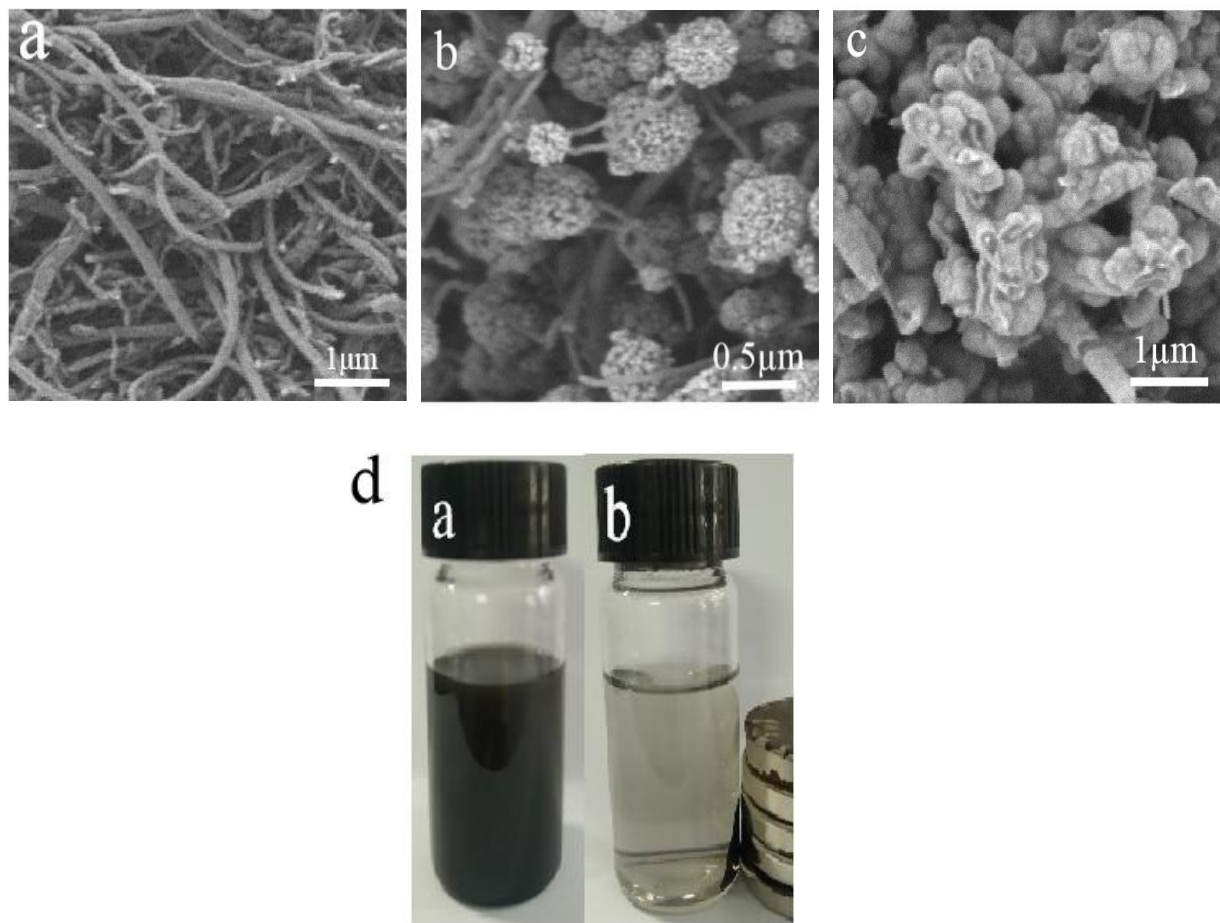

**Figure S1.** The morphology of obtained samples. Scanning electron microscopy of (a) MWCNTs; (b)  $\text{Fe}_3\text{O}_4\text{-MWCNTs}$ ; (c)  $\text{Fe}_3\text{O}_4\text{-MWCNTs@SiO}_2$  and (d) Photograph of  $\text{Fe}_3\text{O}_4\text{-MWCNTs@SiO}_2$  solution without (a) and (b) with applied magnetic field in 10 seconds.

### Energy Dispersive X-ray spectra (EDX)

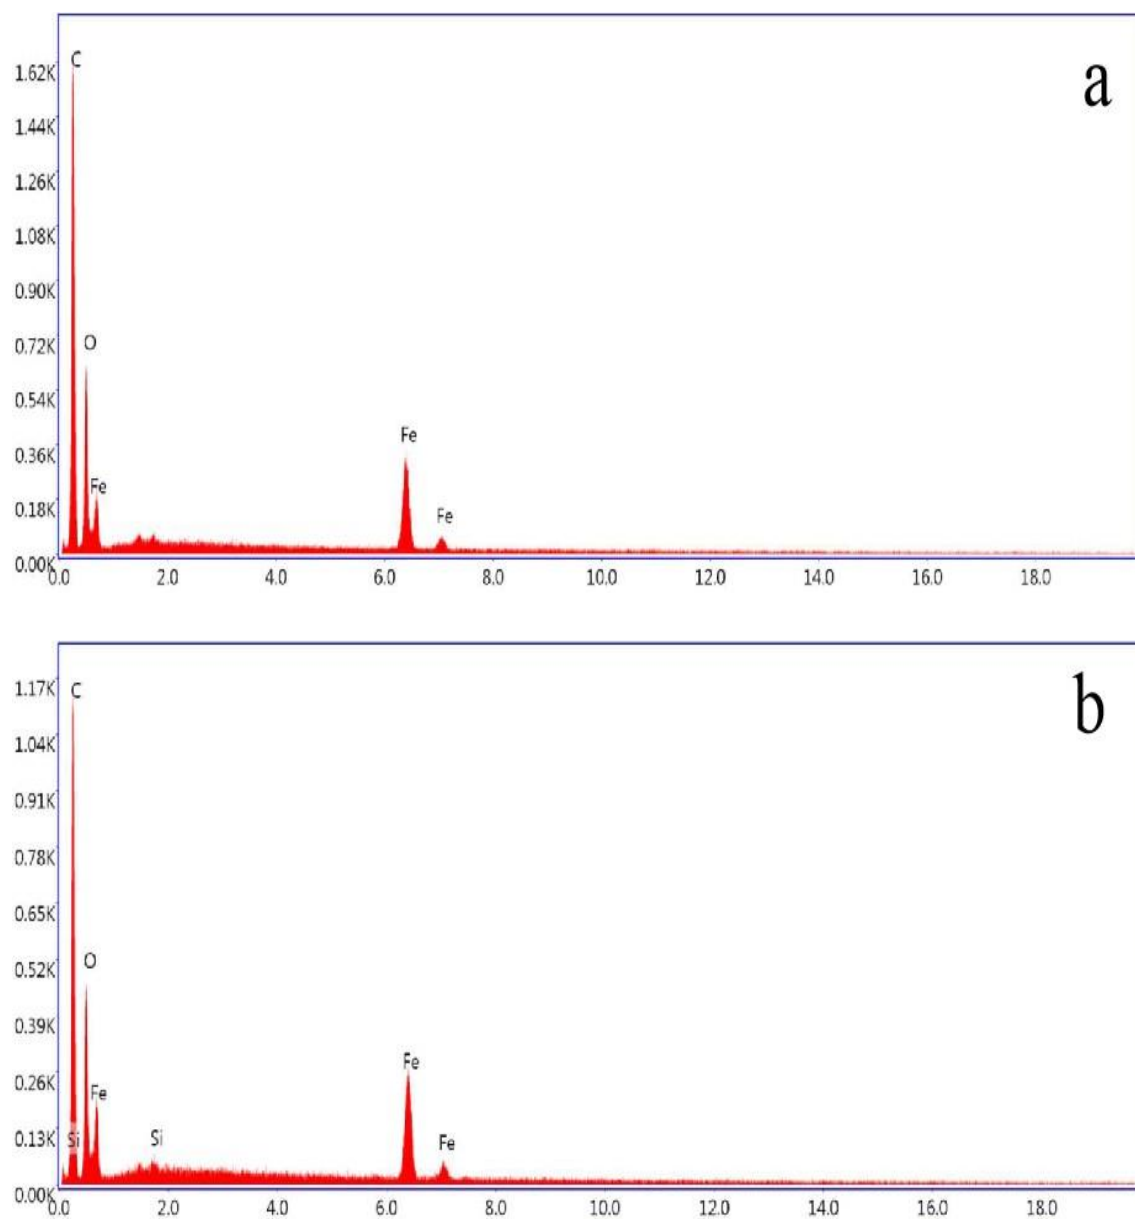

**Figure S2.** Energy-dispersive X-ray spectroscopy (EDX) spectrum of (a) Fe<sub>3</sub>O<sub>4</sub>-MWCNTs and (b) Fe<sub>3</sub>O<sub>4</sub>-MWCNTs@SiO<sub>2</sub>

## Optimization of immobilization conditions (concentration of glutaraldehyde, activation time, concentration of enzyme and immobilization time)

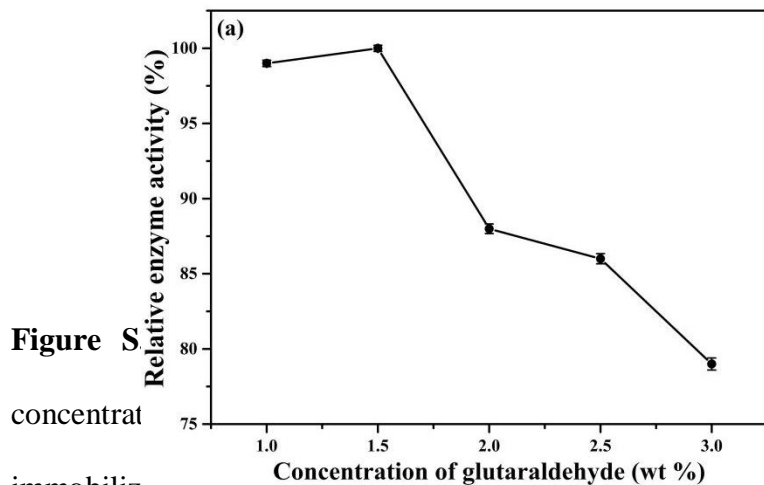

zation. a) Effect of glutaraldehyde enzyme concentration; d) Effect of immobilization time. The activities were calculated by hydrolyzing 2,2'-azino-bis (3-ethylbenzothiazoline-6-sulphonic acid) (ABTS) as substrate under pH 4 at 25 °C for about 5 min.

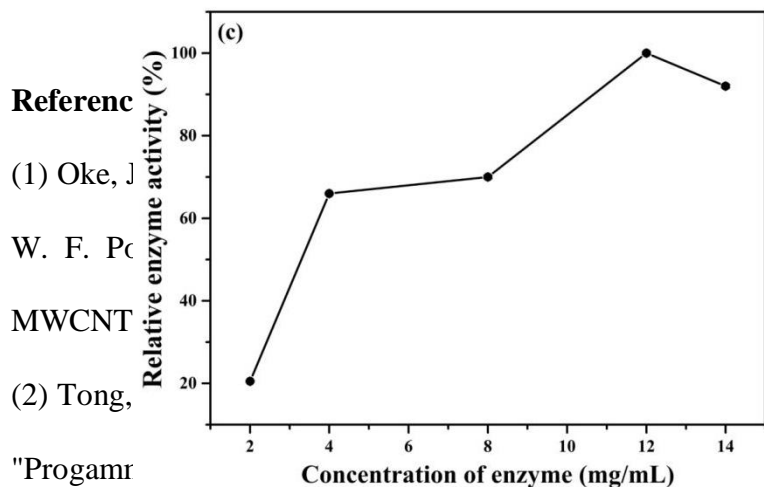

(1) Oke, J. W. F. P. C. MWCNT. (2) Tong, K. H. Chen, A. Ghosh, A. Shelke, and virol change of SiO<sub>2</sub>-Np-Decorated .021/acsomega.9b01958 ng Zheng, Weizhen Li, and Jingli Xu. coated carbon nanotubes for organic

pollutant adsorption." *J. Magn. Magn. Mater.* **2016**, *406*, 35-41.

<http://dx.doi.org/10.1016/j.jmmm.2015.12.085>

(3) Ren, Dajun, Yaohui Cheng, Chaofan Huang, Zhaobo Wang, Shuqin Zhang, Xiaoqing Zhang, and Xiangyi Gong. "Study on remediation-improvement of 2,4-Dichlorophenol contaminated soil by organic fertilizer immobilized laccase." *Soil Sediment Contam.* **(2020)**: 1-15.

<https://doi.org/10.1080/15320383.2020.1828266>
